# Supplementary material
Source: publisher figshare collection journal article supplement (https://acs.figshare.com/ndownloader/files/25485402)
Supplement: Supplementary file 1 [file 25485402]

## Supporting Information – Time-Resolved Cost Analysis of Natural Gas Power Plant

### Conversion to Bioenergy with Carbon Capture and Storage to Support Net-Zero

#### Emissions

Evan Sproul<sup>†\*</sup>, Jay Barlow<sup>†</sup>, Jason C. Quinn<sup>†</sup>

<sup>†</sup>Mechanical Engineering, 1374 Campus Delivery, Colorado State University, Fort Collins, CO 80524-1374

\*Corresponding author: 1374 Campus Delivery

Fort Collins, CO 80524

Email: [evan.sproul@colostate.edu](mailto:evan.sproul@colostate.edu)

Supporting information consists of 21 pages with 12 tables and 10 figures.

## Section S1. Natural Gas and Electricity Price Projections

Figure S1 displays the EIA's electricity price projection for a reference case and the \$25 carbon allowance fee scenarios. The EIA reference case projection is used in the “no emissions pricing”, “social costs of greenhouse gases”, and “EIA \$25 without feedback” scenarios. The EIA \$25 carbon allowance fee is used for the “EIA \$25 with feedback” scenario. Figure S2 displays the natural gas price projections for the EIA reference case and \$25 carbon allowance fee scenarios. The EIA reference case projection is used for the “no emissions pricing” and “social costs of greenhouse gases” scenarios. The EIA \$25 carbon allowance fee projection is used for the “EIA \$25 without feedback” and “EIA \$25 with feedback” scenarios.

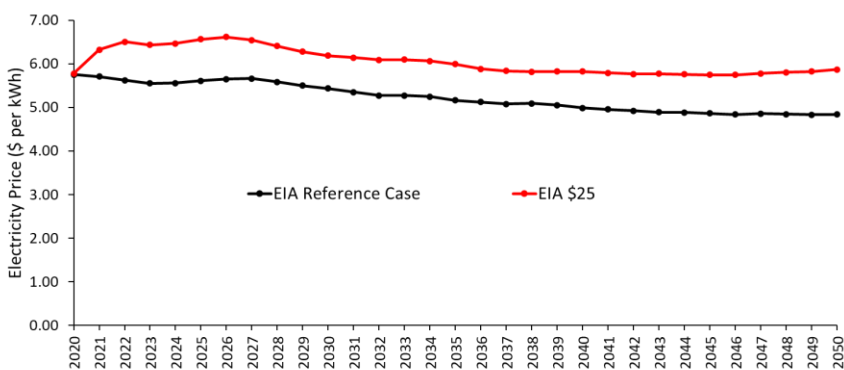

Figure S1. Price of electricity from EIA Reference Case and EIA \$25 Carbon Allowance Fee scenarios<sup>1</sup>.

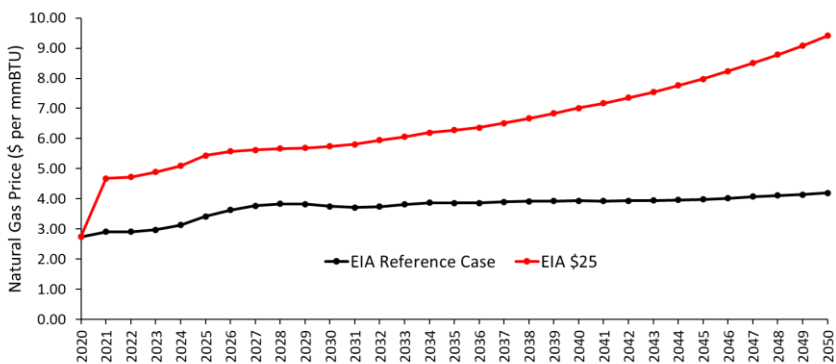

Figure S2. Price of natural gas from EIA Reference Case and EIA \$25 Carbon Allowance Fee scenarios<sup>1</sup>.

## Section S2. Life Cycle Assessment Data

### Normal Operation of an NGCC Power Plant

Data for normal operation of the NGCC power plant was sourced from NETL as summarized in Table S1<sup>2</sup>.

This report was selected as it has a breakout of individual greenhouse gases (CO<sub>2</sub>, CH<sub>4</sub>, and N<sub>2</sub>O), as well as adequate resolution to estimate time resolved emissions. The first emissions extracted from the report were those associated with upstream natural gas production. For this model, a U.S. domestic onshore natural gas well was selected to represent the front of the system boundary. Emissions attributed from this well started with construction and installation. Since a full scale NGCC power plant is supported by a range of well-sites feeding into a pipeline network, the installation (and deinstallation) emissions were assumed to be evenly distributed over the lifetime of the plant. This distribution conveys that wells are not constructed at the onset of the NGCC power plant lifetime but are instead consistently coming online to continue support of power production across the entire sector. Once constructed and installed, operational emissions at the well were assumed to be consistent across all years of the plant. Of the well site emissions, fugitive methane emissions are the most significant contributor to global warming. As a result, these emissions were set as a variable input parameter in the model, with a recent estimate from Alvarez et al. serving as the baseline<sup>3</sup>. Upon leaving the well-site, natural gas is assumed to travel through a domestic onshore pipeline to the NGCC power plant. Emissions from construction, installation, operation, and deinstallation of the pipeline are modeled consistently with the well-site emissions. Pipeline and well-site fugitive emissions are lumped together as a single number. All emissions data from the well-site and pipeline are sourced from NETL in units of kg of greenhouse gas per kg of natural gas delivered to the power plant. The energy content of natural gas (0.049 mmBTU per kg) and the NGCC power plant heat rate (6.45 mmBTU per MWh) are used to convert emissions so they correspond to a functional unit of kW (for construction) or kWh (for operation). At the natural gas power plant emissions are broken down by construction, commissioning, operation, and

decommissioning. For the analysis in this work, construction emissions were distributed evenly across the three years of construction from 2017 through 2019. Within the model, an alternative option exists to distribute the construction emissions according to the capital investment in the first three years of construction. Commissioning emissions were applied in 2019, as they are assumed to occur in the final year of construction. After commissioning, operational emissions are considered constant from 2020 to the end of life or the year in which the NGCC plant is converted to a new technology (biomethane, CCS, or BECCS). At end of life, decommissioning emissions are applied in the final year of operation. All power plant related emissions are sourced in kg of greenhouse gas per MWh of electricity produced.

Table S1. Life cycle emissions data extracted for domestic on shore natural gas production and combustion in an NGCC power plant<sup>2</sup>.

| <b>Well Site (kg per kg natural gas)</b>   |                             |              |           |          |
|--------------------------------------------|-----------------------------|--------------|-----------|----------|
|                                            | Installation/Deinstallation | Construction | Operation | Total    |
| CO <sub>2</sub>                            | 8.54E-07                    | 2.00E-03     | 1.05E-01  | 1.07E-01 |
| N <sub>2</sub> O                           | 2.09E-11                    | 6.25E-08     | 2.19E-07  | 2.82E-07 |
| CH <sub>4</sub>                            | 9.10E-10                    | 3.66E-06     | 1.67E-03  | 1.67E-03 |
| <b>Pipeline (kg per kg natural gas)</b>    |                             |              |           |          |
|                                            | Installation                | Construction | Operation | Total    |
| CO <sub>2</sub>                            | 3.54E-06                    | 4.52E-04     | 7.96E-03  | 8.42E-03 |
| N <sub>2</sub> O                           | 7.13E-11                    | 2.41E-08     | 1.38E-07  | 1.62E-07 |
| CH <sub>4</sub>                            | 3.49E-09                    | 5.31E-07     | 4.94E-04  | 4.95E-04 |
| <b>NGCC Plant without CCS (kg per MWh)</b> |                             |              |           |          |
|                                            | Installation/Deinstallation | Construction | Operation | Total    |
| CO <sub>2</sub>                            | 3.70E-01                    | 1.50E-02     | 3.65E+02  | 3.65E+02 |
| N <sub>2</sub> O                           | 1.15E-05                    | 3.75E-07     | 2.06E-06  | 1.39E-05 |
| CH <sub>4</sub>                            | 3.19E-04                    | 1.60E-05     | 7.47E-06  | 3.42E-04 |
| <b>NGCC Plant with CCS (kg per MWh)</b>    |                             |              |           |          |
|                                            | Installation/Deinstallation | Construction | Operation | Total    |
| CO <sub>2</sub>                            | 5.10E-01                    | 1.94E-02     | 4.71E+01  | 4.76E+01 |
| N <sub>2</sub> O                           | 1.82E-05                    | 4.83E-07     | 2.39E-06  | 2.11E-05 |
| CH <sub>4</sub>                            | 4.57E-04                    | 2.06E-05     | 8.76E-06  | 4.86E-04 |

### **Fuel Switch to Biomethane**

Biomethane production emissions vary across literature. An estimate of 25 gCO<sub>2</sub>-eq per MJ was selected for this analysis. A breakout of individual greenhouse gases was not available, therefore all 25g of CO<sub>2</sub>eq are considered as CO<sub>2</sub> within the model. In the case of a fuel switch, all emissions associated with natural gas are removed from the analysis and replaced with this single emissions value. This corresponds to a 100% replacement of natural gas with biomethane.

### **Retrofit of NGCC plant with CCS**

CCS data was also sourced from the NETL report for consistency. Adding CCS to the NGCC plant results in additional construction, commissioning, and decommissioning emissions, as well as different operational emissions. Construction and commissioning emissions are applied in the year in which CCS was added. Operational emissions occur from the addition of CCS to the plant end of life. Operational emissions include the burden of an increased heat rate (7.53 mmBTU per MWh) from fuel consumption required to recover amine solvents. However, overall combustion emissions are greatly reduced by an assumed 90% post-combustion CO<sub>2</sub> separation and storage rate.

### **Fuel Switch to Biomethane and Addition of CCS Resulting in BECCS**

When fuel switching and addition of CCS occur simultaneously the result is a bioenergy with CCS (BECCS) system. In the BECCS system, 25 g CO<sub>2</sub> is attributed to biomethane production and CCS capital and operational costs are adjusted in line with the retrofit mentioned above. The result is an overall net-negative emissions burden associated with BECCS power production.

### **Section S3. Example of Conversion with No Emissions Pricing in 2025**

Using the baseline defined in Section 2.3.1, this example evaluation considered converting to low-emissions technology options in the year 2025 to illustrate how cost targets are created. In the evaluation, the NGCC power plant was constructed over three years starting in 2017 and operated normally from 2020-2024. In 2025, operation was changed to one of three technology options. The first option was a fuel switch from natural gas to biomethane. This switch required placing a price on biomethane which has estimated production costs ranging from below \$10 per mmBTU to over \$20 per mmBTU<sup>4,5</sup>. This initial evaluation assumed \$10 per mmBTU, which aligns with production cost estimates from a UC Davis report and a previous fixed contract price (\$9.80 per mmBTU) paid by the Los Angeles Department of Water and Power<sup>4,6</sup>. However, this value was also varied in the analysis to demonstrate the effects of uncertainty of biomethane pricing and the potential for future technological development resulting in further cost reduction. The second option was the addition of CCS to the existing NGCC power plant. In this option the plant continued operation, but it was retrofit with CCS over the course of a year. CCS capital costs of the retrofit were set at \$1797 per kW, which aligns with an average estimate used in EIA electricity models<sup>7</sup>. Separation and compression of the CCS CO<sub>2</sub> stream using an amine solvent required increased operational costs, as well as an increased heat rate (7.53 mmBTU per MWh or 45.3%) due to the increased consumption of natural gas associated with solvent recovery<sup>8</sup>. The third option was BECCS based on the combined switch from natural gas to biomethane and the addition of CCS. In this scenario, the two changes occur simultaneously (biomethane switch at the onset of the CCS construction) and the BECCS system operates from 2025 to the plant's end of life in 2050. In addition to these three technology options, a fourth option of plant shutdown was also considered. During shutdown all operations and revenue ceased immediately, and the plant was decommissioned over a one-year period. The four options were each run through the TEA and solved for the resulting NPV. The results were compared across each technology option as well as the baseline case of normal operation.

CCS capital costs and biomethane fuel costs were then varied to determine cost targets that result in the technology options matching the NPV of normal operation.

Figure S3 displays the NPV for normal operation, shutdown, and the three low-emissions technology options without emission pricing policies. Changing from normal operation of the NGCC power plant to any of the three low-emissions technologies will result in a negative NPV. Switching to biomethane at \$10 per mmBTU is the cheapest of the technology options, but still yields an NPV significantly worse than shutdown. Addition of CCS represents a large cost as seen in the large negative slope in 2025 and results in an NPV less than -\$1000 per kW at the end of life, making both CCS alternatives (natural gas and biomethane) uncompetitive. The modeling work assumes biomethane and CCS costs based on existing literature, as there is ongoing technological development in these areas to reduce costs. Due to the uncertainty of these costs, further work was done to understand the impact of varying these costs and identify cost targets that would make biomethane, CCS, and BECCS options yield an NPV equal to the baseline of normal operation.

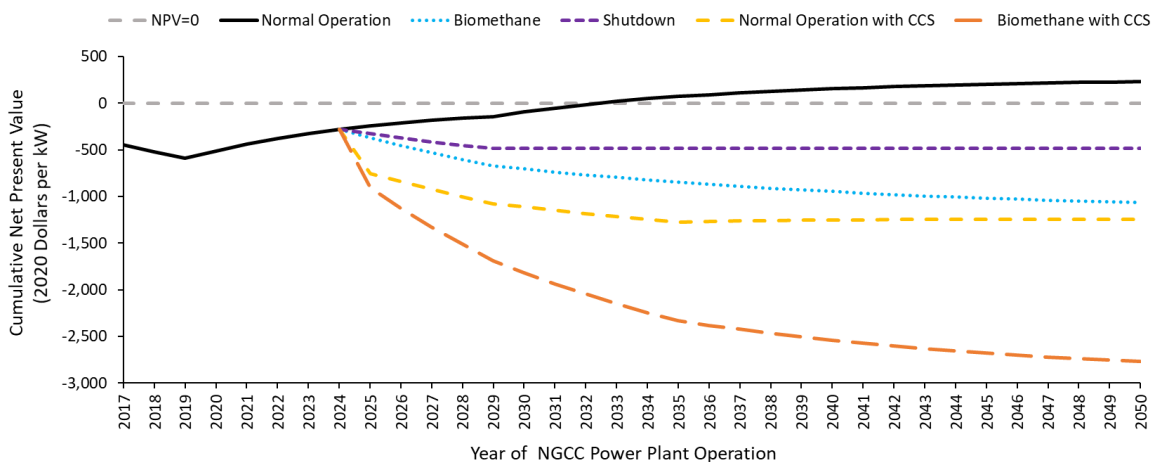

Figure S3. Comparison of continuing normal operation of natural gas power plant (black line) and shutdown (purple line) with changing to one of three different technology alternatives in the year 2025 without emissions pricing. Viable options would either meet or exceed the NPV of normal operation.

The significant effect of varying biomethane fuel costs for the NGCC power plant is presented in Figure S4. Reducing fuel costs from \$10 per mmBTU to \$3 per mmBTU increases NPV by \$1437 per kW and represents an economically viable solution. A fuel cost of \$3.80 per mmBTU will match the baseline NPV of normal operation. The actual production costs of biomethane are dependent upon the specific method of production and the overall market demand for that biomethane. The \$3.80 per mmBTU cost target falls well below current estimates for biomethane production<sup>4,5</sup>. It is important to note that while biomethane was the focus of this analysis, any readily-substitutable fuel produced at or below \$3.80 per mmBTU would provide a viable substitute when emissions pricing is not included. However, the emissions associated with a fuel other than biomethane would have impacts on the emissions pricing evaluations presented in later sections.

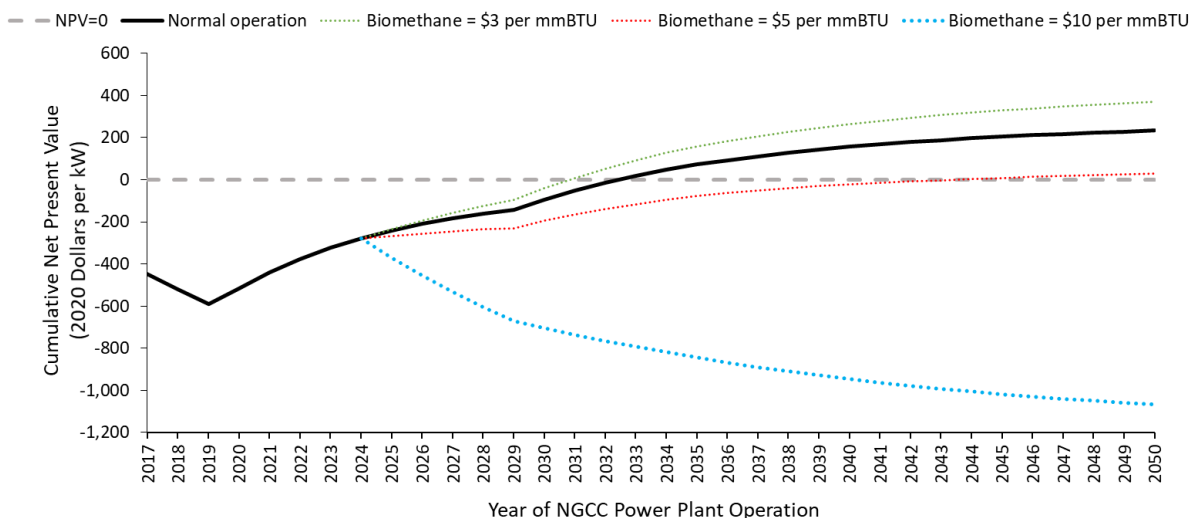

Figure S4. Net present value of normal plant operation with natural gas compared to operating with biomethane at three different biomethane fuel costs without emissions pricing.

A cost target was also identified for adding CCS to the existing NGCC power plant. Defining this target required varying the CCS capital cost and plant operational costs (fuel cost and the heat rate of the NGCC plant after CCS was added), since each of these represents a critical uncertainty of future



technological development. Figure S5 shows the cost target result for the addition of CCS. Costs inside the purple shaded region of the figure will result in an NPV equal to or higher than normal operation. It is important to note that in this specific evaluation the fuel cost can be the cost of natural gas, biomethane, or another equivalent drop-in fuel. In later evaluations, the use of emissions pricing will not allow for this simplification. Figure S5 highlights that the cost target for CCS capital is below current cost estimates which the EIA places between \$1313 and \$2533 per kW<sup>7</sup>. Even at a fuel price of \$0 per mmbTU, the CCS capital costs required to compete with normal operation must be at or below \$967 which is 26% less than the low end of the current EIA range. Conversely, a more realistic estimate of current CCS operational costs such as \$75.3 per MWh (\$10 per mmbTU, 7.53 mmbTU per MWh) falls well outside the target, regardless of capital costs. These results further illustrate the findings of Figure S3 and demonstrates that new technologies such as CCS face a significant economic challenge without economic incentives such as emissions pricing.

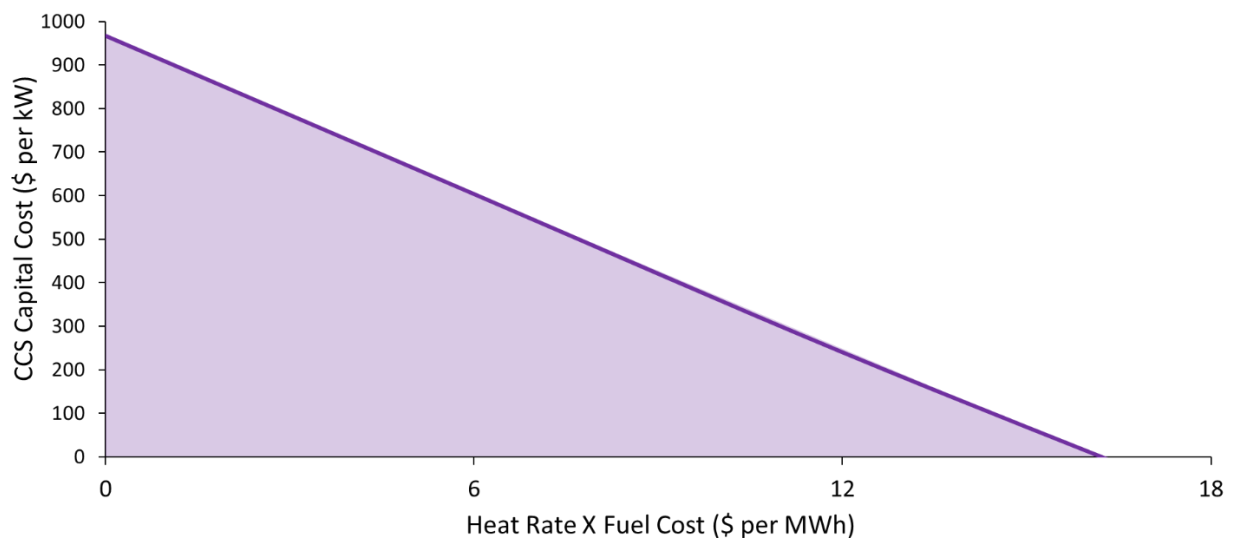

Figure S5. Cost targets for addition of CCS to existing NGCC power plant in the year 2025. Points inside the targets (purple shaded region) will yield an NPV higher than that of normal operation defined in the baseline scenario.

## Section S4. Detailed Analysis of Biomethane Fuel Switch without CCS

A biomethane fuel switch was analyzed without CCS, to define biomethane production cost targets for operation at the constant average capacity factor of 58%. A result of 16 separate biomethane cost targets were found by varying emissions pricing and the year in which fuel switch takes place. The relationship between conversion timing, emissions pricing, and biomethane cost targets are presented in Figure S6. Each point in the figure represents the maximum biomethane cost that would allow for a switch to biomethane while yielding a higher NPV than normal operation or shutdown, whichever was most economically favorable. Consideration of shutdown must be included as it sometimes yields a higher NPV than normal operation when there is a price on emissions with the end results dependent on the emissions pricing scenario. For example, if 3% social costs are considered, a switch to biomethane in the year 2035 would be viable if biomethane costs were below \$4.95 per mmBTU. Anything above this cost would result in a lower NPV than shutdown and would not be economically viable. Further clarification regarding comparisons to both shutdown and normal operation can be found within Figures S7-S10 of the supporting information.

In Figure S6, two major trends are apparent. The first is that adding a price to emissions raises the biomethane cost targets required to hit the NPV of normal operation with natural gas. This means that biomethane can be purchased at a higher price, making the fuel switch to biomethane more likely. The second major trend in Figure S6 is illustrated by the slopes of the cost target lines across the different scenarios as a function of conversion year. In the scenario with no emissions pricing (blue line), the upward slope of the line indicates that a fuel switch to biomethane should be delayed to decrease the impact of biomethane prices within the analysis. This would result in higher life-cycle greenhouse gas emissions. Conversely, in the social cost scenario (red line), the downward trend of the line indicates that the switch to biomethane should occur as early as possible to mitigate the large costs of near-term greenhouse gas emissions. This demonstrates, in idealized form, the desired effect of an emissions price

to incentivize emissions reductions. The EIA \$25 carbon fee with and without feedback show two different results. First, the scenario without electricity price feedback shows that the cost target peaks in 2035 and then starts to decline in later years. The scenario with electricity price feedbacks does not decline after 2030, meaning the target increases over time, similar to the no price on emissions scenario, but at a higher price point due to the applied price on emissions. The difference between the scenarios with and without feedbacks after 2025 is the result of large differences in NPV due to expected electricity prices. The scenario with feedbacks will make more revenue from electricity, which compensates for the emissions price, and thus encourages a delay in the switch to biomethane. The situation without feedbacks will not benefit from this increased revenue, leading to the lower cost targets in later years, incentivizing an earlier switch to biomethane.

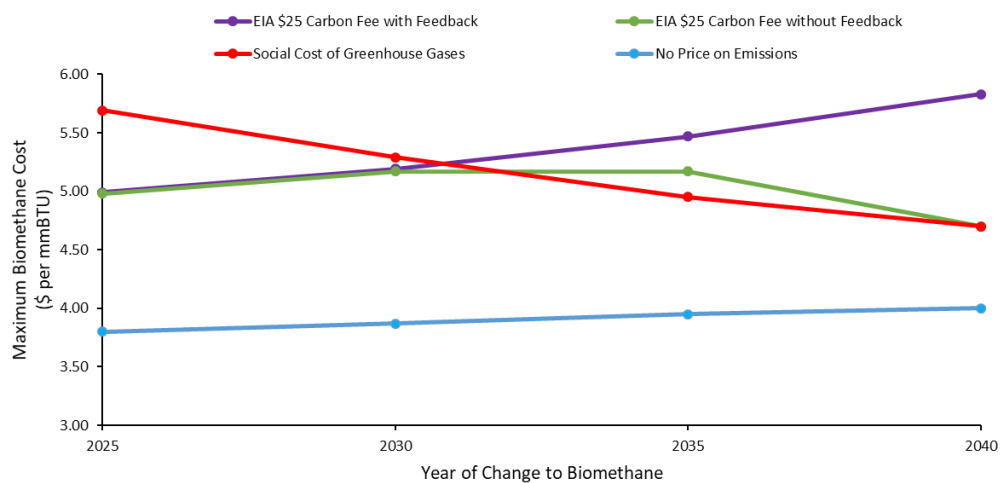

Figure S6. Maximum cost targets for biomethane based on varying fuel switch year and emissions pricing scenarios. A negative slope indicates that an earlier switch to biomethane is favorable.

Figures S7 – S10 display the cumulative NPV results of solving for biomethane fuel switch cost targets. The figures highlight a fuel switch to biomethane in 2025, 2030, 2035, and 2040, with varying emissions pricing scenarios. Across the figures biomethane cost targets are implemented to compete with normal operation or shutdown, whichever has a higher NPV by the year 2050. For example, in Figure S7 the

social cost of greenhouse gases gives shutdown a high NPV. As a result, the biomethane cost target is set to match this NPV. In contrast the EIA \$25 carbon allowance fee scenarios give normal operation a high NPV, and the biomethane cost target is set to match the NPV of normal operation. In another example, Figure S9 the EIA \$25 carbon allowance fee without feedback drives shutdown to have a higher NPV, causing the biomethane cost target to be set to match this NPV. However, in the EIA \$25 carbon allowance fee without feedback, normal operation has the highest NPV, causing the biomethane cost target to match this value. Each scenario evaluated is dependent upon the magnitude of the emissions price and year of fuel switch. These factors determine how quickly capital costs are recovered and whether normal operation or shutdown has a higher NPV. Table S2 displays the biomethane fuel switch targets that correspond with matching the highest NPV in Figures S7 – S10.

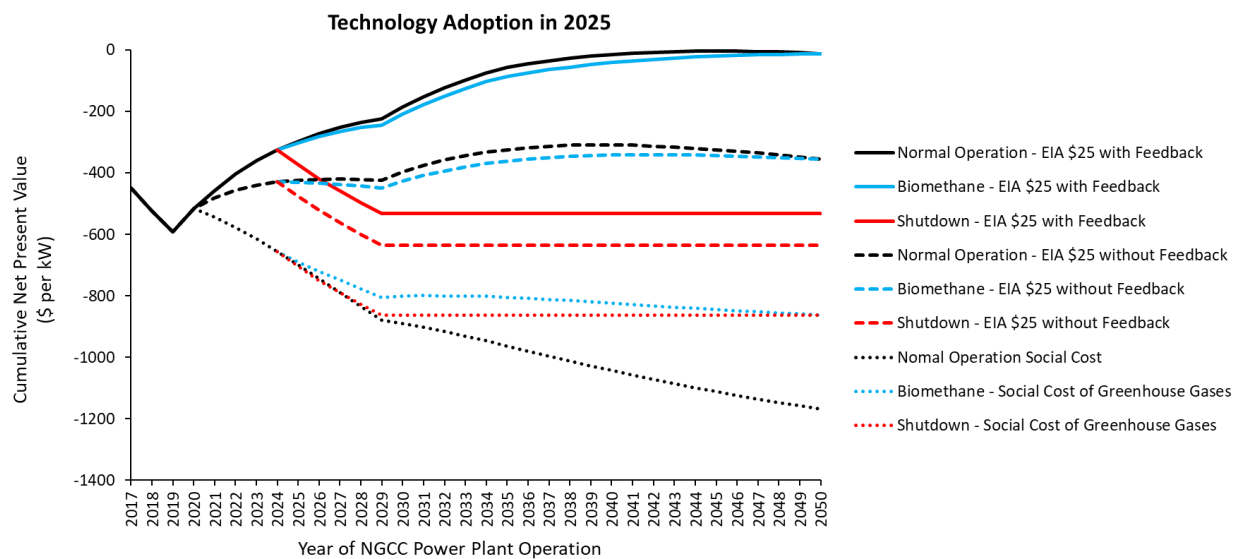

Figure S7. NPV of biomethane fuel switch, shutdown, and normal operation used to identify biomethane cost targets for a fuel switch in the year 2025.

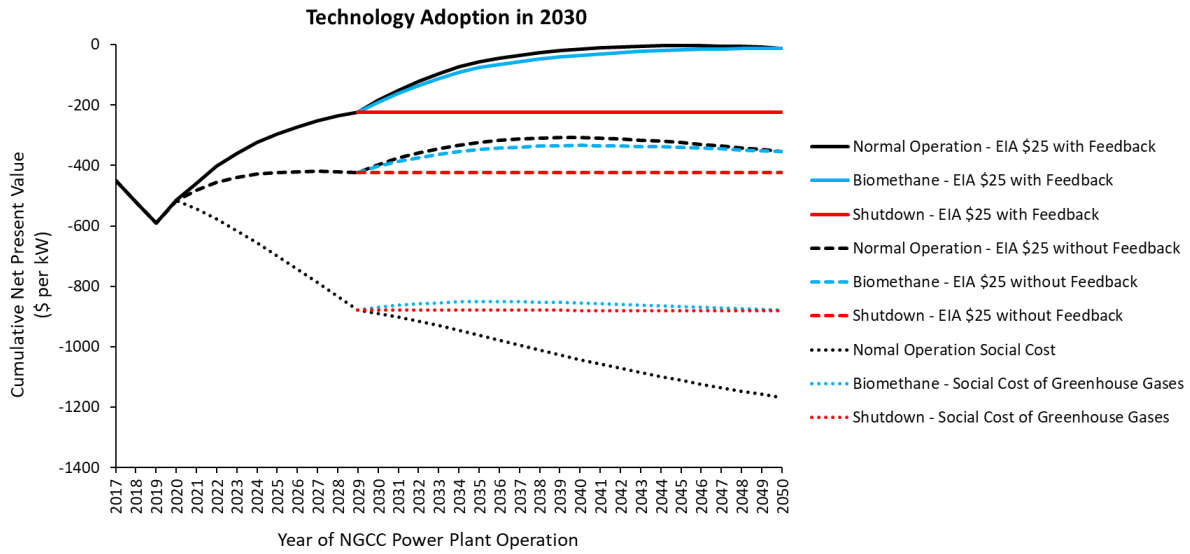

Figure S8. NPV of biomethane fuel switch, shutdown, and normal operation used to identify biomethane cost targets for a fuel switch in the year 2030.

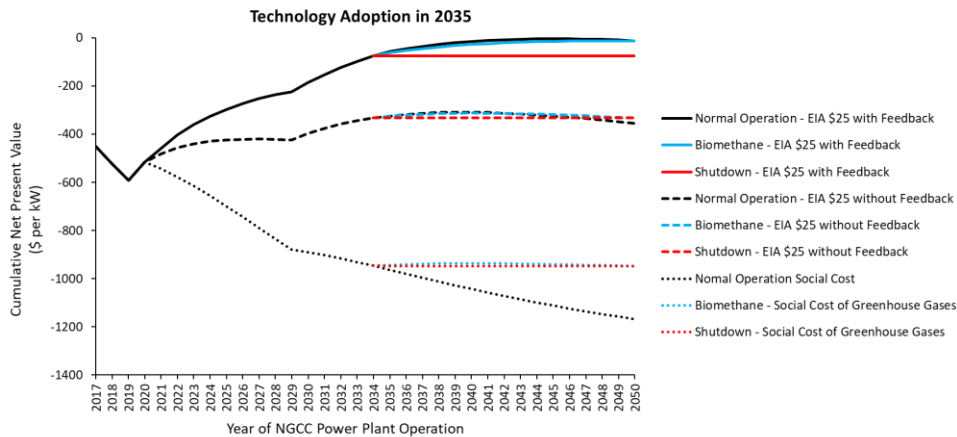

Figure S9. NPV of biomethane fuel switch, shutdown, and normal operation used to identify biomethane cost targets for a fuel switch in the year 2035.

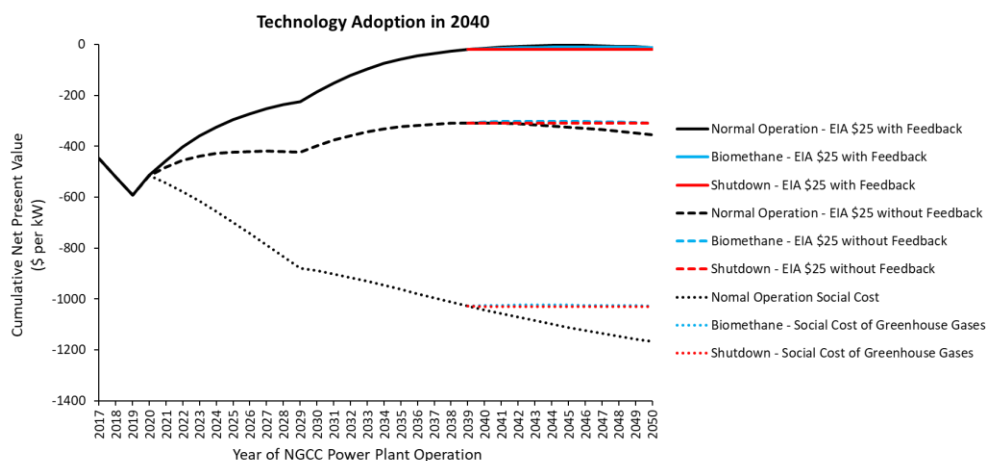

Figure S10. NPV of biomethane fuel switch, shutdown, and normal operation used to identify biomethane cost targets for a fuel switch in the year 2040.

Table S2. Fuel cost targets (\$ per mmbTU) for fuel switch to biomethane with varying emissions pricing and years of fuel switch.

| Year of Switch to Biomethane         | 2025 | 2030 | 2035 | 2040 |
|--------------------------------------|------|------|------|------|
| No Price on Emissions                | 3.80 | 3.87 | 3.95 | 4.00 |
| Social Cost of Greenhouse Gases      | 5.69 | 5.29 | 4.95 | 4.70 |
| EIA \$25 Carbon Fee without Feedback | 4.98 | 5.17 | 5.17 | 4.7  |
| EIA \$25 Carbon Fee with Feedback    | 4.99 | 5.19 | 5.47 | 5.83 |

## Section S5. Full list of BECCS technology cost targets

Tables S3 – S12 display the full list of cost targets required for BECCS to compete with the NPV of normal operation or shutdown, whichever is higher for a given scenario. For a BECCS conversion to be viable, capital and operation (fuel cost X heat rate) costs must be equal to or less than the cost targets.

Negative values imply that the technology would not be feasible. Tables S3 – S6 are the cost targets if the BECCS conversion continued to operate at a constant average capacity factor (58%) for its remaining lifetime. Tables S7 – S10 are the cost targets if the BECCS conversion operated at a higher capacity factor (87%) after the conversion was complete. Tables S11 – S12 show the impact of altering biomethane production and distribution emissions under two different capacity factor scenarios.

Table S3. Full list of cost targets for fuel switch to biomethane and addition of carbon capture and storage in 2025 at constant average capacity factor (58%).

| 2025                      |                              | Fuel Cost (\$ per mmBTU) |      |      |       |       |       |       |       |       |       |       |
|---------------------------|------------------------------|--------------------------|------|------|-------|-------|-------|-------|-------|-------|-------|-------|
|                           |                              | 0                        | 1    | 2    | 3     | 4     | 5     | 6     | 7     | 8     | 9     | 10    |
| Emissions Pricing         | Heat Rate<br>(mmBTU per MWh) | Capital Cost (\$ per kW) |      |      |       |       |       |       |       |       |       |       |
| No Emissions Pricing      | 6                            | 967                      | 603  | 240  | -100  | -396  | -694  | -1040 | -1420 | -1800 | -2180 | -2561 |
|                           | 8                            | 967                      | 482  | -2   | -396  | -801  | -1293 | -1800 | -2307 | -2814 | -3321 | -3828 |
|                           | 10                           | 967                      | 361  | -199 | -694  | -1293 | -1927 | -2561 | -3194 | -3828 | -4462 | -5096 |
|                           | 12                           | 967                      | 240  | -396 | -1040 | -1800 | -2561 | -3321 | -4082 | -4842 | -5603 | -6363 |
| 3% Social Cost            | 6                            | 3124                     | 2761 | 2398 | 2033  | 1667  | 1297  | 916   | 536   | 156   | -224  | -605  |
|                           | 8                            | 2911                     | 2426 | 1940 | 1450  | 944   | 437   | -70   | -577  | -1084 | -1591 | -2098 |
|                           | 10                           | 2697                     | 2090 | 1478 | 845   | 212   | -422  | -1056 | -1690 | -2323 | -2957 | -3591 |
|                           | 12                           | 2483                     | 1752 | 1000 | 239   | -521  | -1282 | -2042 | -2802 | -3563 | -4323 | -5084 |
| EIA \$25 without Feedback | 6                            | 1915                     | 1554 | 1193 | 833   | 472   | 110   | -263  | -644  | -1024 | -1404 | -1784 |
|                           | 8                            | 1915                     | 1434 | 953  | 472   | -11   | -517  | -1024 | -1531 | -2038 | -2545 | -3052 |
|                           | 10                           | 1915                     | 1314 | 712  | 110   | -517  | -1151 | -1784 | -2418 | -3052 | -3686 | -4319 |
|                           | 12                           | 1915                     | 1193 | 472  | -263  | -1024 | -1784 | -2545 | -3305 | -4066 | -4826 | -5587 |
| EIA \$25 with Feedback    | 6                            | 1925                     | 1565 | 1204 | 843   | 479   | 116   | -202  | -531  | -911  | -1291 | -1672 |
|                           | 8                            | 1925                     | 1444 | 963  | 479   | -4    | -415  | -911  | -1418 | -1925 | -2432 | -2939 |
|                           | 10                           | 1925                     | 1324 | 722  | 116   | -415  | -1038 | -1672 | -2305 | -2939 | -3573 | -4206 |
|                           | 12                           | 1925                     | 1204 | 479  | -202  | -911  | -1672 | -2432 | -3193 | -3953 | -4713 | -5474 |

Table S4. Full list of cost targets for fuel switch to biomethane and addition of carbon capture and storage in 2030 at constant average capacity factor (58%).

| 2030                      |                           | Fuel Cost (\$ per mmBTU) |      |      |      |       |       |       |       |       |       |       |
|---------------------------|---------------------------|--------------------------|------|------|------|-------|-------|-------|-------|-------|-------|-------|
| Emissions Pricing         | Heat Rate (mmBTU per MWh) | 0                        | 1    | 2    | 3    | 4     | 5     | 6     | 7     | 8     | 9     | 10    |
| No Emissions Pricing      | 6                         | Capital Cost (\$ per kW) |      |      |      |       |       |       |       |       |       |       |
|                           | 8                         | 933                      | 593  | 253  | -71  | -348  | -625  | -916  | -1271 | -1627 | -1982 | -2338 |
|                           | 10                        | 933                      | 480  | 26   | -348 | -719  | -1152 | -1627 | -2101 | -2576 | -3050 | -3525 |
|                           | 12                        | 933                      | 366  | -163 | -625 | -1152 | -1745 | -2338 | -2931 | -3525 | -4118 | -4711 |
| 3% Social Cost            | 6                         | 933                      | 253  | -348 | -916 | -1627 | -2338 | -3050 | -3762 | -4473 | -5185 | -5897 |
|                           | 8                         | 2893                     | 2550 | 2207 | 1858 | 1502  | 1146  | 790   | 435   | 79    | -277  | -633  |
|                           | 10                        | 2678                     | 2219 | 1751 | 1277 | 802   | 328   | -147  | -621  | -1096 | -1570 | -2045 |
|                           | 12                        | 2461                     | 1882 | 1289 | 696  | 102   | -491  | -1084 | -1677 | -2270 | -2863 | -3456 |
| EIA \$25 without Feedback | 6                         | 2245                     | 1538 | 826  | 114  | -597  | -1309 | -2021 | -2733 | -3444 | -4156 | -4868 |
|                           | 8                         | 1976                     | 1637 | 1297 | 956  | 616   | 273   | -81   | -437  | -793  | -1149 | -1505 |
|                           | 10                        | 1976                     | 1523 | 1070 | 616  | 156   | -319  | -793  | -1267 | -1742 | -2216 | -2691 |
|                           | 12                        | 1976                     | 1410 | 843  | 273  | -319  | -912  | -1505 | -2098 | -2691 | -3284 | -3877 |
| EIA \$25 with Feedback    | 6                         | 1976                     | 1297 | 616  | -81  | -793  | -1505 | -2216 | -2928 | -3640 | -4352 | -5063 |
|                           | 8                         | 1961                     | 1623 | 1285 | 946  | 608   | 269   | -58   | -348  | -696  | -1052 | -1408 |
|                           | 10                        | 1961                     | 1510 | 1059 | 608  | 156   | -249  | -696  | -1170 | -1645 | -2119 | -2594 |
|                           | 12                        | 1961                     | 1397 | 834  | 269  | -249  | -815  | -1408 | -2001 | -2594 | -3187 | -3780 |
|                           |                           | 1961                     | 1285 | 608  | -58  | -696  | -1408 | -2119 | -2831 | -3543 | -4254 | -4966 |

Table S5. Full list of cost targets for fuel switch to biomethane and addition of carbon capture and storage in 2035 at constant average capacity factor (58%).

| 2035                      |                           | Fuel Cost (\$ per mmBTU) |      |      |      |       |       |       |       |       |       |       |
|---------------------------|---------------------------|--------------------------|------|------|------|-------|-------|-------|-------|-------|-------|-------|
| Emissions Pricing         | Heat Rate (mmBTU per MWh) | 0                        | 1    | 2    | 3    | 4     | 5     | 6     | 7     | 8     | 9     | 10    |
| No Emissions Pricing      | 6                         | Capital Cost (\$ per kW) |      |      |      |       |       |       |       |       |       |       |
|                           | 8                         | 859                      | 555  | 250  | -44  | -292  | -539  | -790  | -1073 | -1391 | -1709 | -2028 |
|                           | 10                        | 859                      | 453  | 48   | -292 | -622  | -969  | -1391 | -1815 | -2240 | -2664 | -3089 |
|                           | 12                        | 859                      | 352  | -126 | -539 | -969  | -1497 | -2028 | -2558 | -3089 | -3619 | -4150 |
| 3% Social Cost            | 6                         | 859                      | 250  | -292 | -790 | -1391 | -2028 | -2664 | -3301 | -3938 | -4574 | -5211 |
|                           | 8                         | 2582                     | 2264 | 1945 | 1627 | 1309  | 990   | 672   | 354   | 35    | -283  | -601  |
|                           | 10                        | 2368                     | 1943 | 1519 | 1095 | 670   | 246   | -179  | -603  | -1028 | -1452 | -1877 |
|                           | 12                        | 2154                     | 1623 | 1093 | 562  | 31    | -499  | -1030 | -1560 | -2091 | -2621 | -3152 |
| EIA \$25 without Feedback | 6                         | 1939                     | 1303 | 666  | 29   | -607  | -1244 | -1881 | -2517 | -3154 | -3791 | -4427 |
|                           | 8                         | 1882                     | 1577 | 1271 | 965  | 657   | 342   | 23    | -295  | -613  | -932  | -1250 |
|                           | 10                        | 1882                     | 1475 | 1067 | 657  | 236   | -189  | -613  | -1038 | -1462 | -1887 | -2311 |
|                           | 12                        | 1882                     | 1373 | 862  | 342  | -189  | -719  | -1250 | -1780 | -2311 | -2842 | -3372 |
| EIA \$25 with Feedback    | 6                         | 1882                     | 1271 | 657  | 23   | -613  | -1250 | -1887 | -2523 | -3160 | -3797 | -4433 |
|                           | 8                         | 1945                     | 1641 | 1337 | 1032 | 728   | 424   | 120   | -150  | -432  | -751  | -1069 |
|                           | 10                        | 1945                     | 1539 | 1134 | 728  | 323   | -67   | -432  | -857  | -1281 | -1706 | -2130 |
|                           | 12                        | 1945                     | 1438 | 931  | 424  | -67   | -538  | -1069 | -1600 | -2130 | -2661 | -3191 |
|                           |                           | 1945                     | 1337 | 728  | 120  | -432  | -1069 | -1706 | -2342 | -2979 | -3616 | -4252 |



Table S6. Full list of cost targets for fuel switch to biomethane and addition of carbon capture and storage in 2040 at constant average capacity factor (58%).

| 2040                      |                              | Fuel Cost (\$ per mmBTU) |      |      |      |       |       |       |       |       |       |       |
|---------------------------|------------------------------|--------------------------|------|------|------|-------|-------|-------|-------|-------|-------|-------|
| Emissions Pricing         | Heat Rate<br>(mmBTU per MWh) | 0                        | 1    | 2    | 3    | 4     | 5     | 6     | 7     | 8     | 9     | 10    |
| Capital Cost (\$ per kW)  |                              |                          |      |      |      |       |       |       |       |       |       |       |
| No Emissions Pricing      | 6                            | 693                      | 453  | 212  | -24  | -227  | -430  | -633  | -871  | -1132 | -1392 | -1653 |
|                           | 8                            | 693                      | 372  | 51   | -227 | -498  | -784  | -1132 | -1479 | -1827 | -2174 | -2521 |
|                           | 10                           | 693                      | 292  | -92  | -430 | -784  | -1218 | -1653 | -2087 | -2521 | -2956 | -3390 |
|                           | 12                           | 693                      | 212  | -227 | -633 | -1132 | -1653 | -2174 | -2695 | -3216 | -3738 | -4259 |
| 3% Social Cost            | 6                            | 2098                     | 1838 | 1577 | 1316 | 1056  | 795   | 535   | 274   | 13    | -247  | -508  |
|                           | 8                            | 1914                     | 1566 | 1219 | 871  | 524   | 176   | -171  | -518  | -866  | -1213 | -1561 |
|                           | 10                           | 1730                     | 1295 | 861  | 426  | -8    | -442  | -877  | -1311 | -1745 | -2180 | -2614 |
|                           | 12                           | 1545                     | 1024 | 503  | -18  | -540  | -1061 | -1582 | -2103 | -2625 | -3146 | -3667 |
| EIA \$25 without Feedback | 6                            | 1434                     | 1194 | 953  | 712  | 471   | 229   | -24   | -284  | -545  | -805  | -1066 |
|                           | 8                            | 1434                     | 1113 | 792  | 471  | 148   | -197  | -545  | -892  | -1240 | -1587 | -1935 |
|                           | 10                           | 1434                     | 1033 | 632  | 229  | -197  | -632  | -1066 | -1500 | -1935 | -2369 | -2803 |
|                           | 12                           | 1434                     | 953  | 471  | -24  | -545  | -1066 | -1587 | -2108 | -2630 | -3151 | -3672 |
| EIA \$25 with Feedback    | 6                            | 1713                     | 1472 | 1231 | 990  | 750   | 509   | 268   | 27    | -212  | -473  | -734  |
|                           | 8                            | 1713                     | 1392 | 1071 | 750  | 429   | 107   | -212  | -560  | -907  | -1255 | -1602 |
|                           | 10                           | 1713                     | 1311 | 910  | 509  | 107   | -299  | -734  | -1168 | -1602 | -2037 | -2471 |
|                           | 12                           | 1713                     | 1231 | 750  | 268  | -212  | -734  | -1255 | -1776 | -2297 | -2818 | -3340 |

Table S7. Full list of cost targets for fuel switch to biomethane and addition of carbon capture and storage in 2025 with increase to high capacity factor (87%).

| 2025                      |                              | Fuel Cost (\$ per mmBTU) |      |      |       |       |       |       |       |       |       |       |
|---------------------------|------------------------------|--------------------------|------|------|-------|-------|-------|-------|-------|-------|-------|-------|
| Emissions Pricing         | Heat Rate<br>(mmBTU per MWh) | 0                        | 1    | 2    | 3     | 4     | 5     | 6     | 7     | 8     | 9     | 10    |
| Capital Cost (\$ per kW)  |                              |                          |      |      |       |       |       |       |       |       |       |       |
| No Emissions Pricing      | 6                            | 1437                     | 940  | 442  | -46   | -453  | -859  | -1271 | -1771 | -2293 | -2814 | -3336 |
|                           | 8                            | 1437                     | 774  | 109  | -453  | -995  | -1597 | -2293 | -2988 | -3684 | -4380 | -5076 |
|                           | 10                           | 1437                     | 608  | -182 | -859  | -1597 | -2467 | -3336 | -4206 | -5076 | -5946 | -6816 |
|                           | 12                           | 1437                     | 442  | -453 | -1271 | -2293 | -3336 | -4380 | -5424 | -6468 | -7511 | -8555 |
| 3% Social Cost            | 6                            | 4358                     | 3865 | 3372 | 2879  | 2384  | 1888  | 1388  | 874   | 352   | -170  | -692  |
|                           | 8                            | 4065                     | 3408 | 2750 | 2089  | 1424  | 734   | 39    | -657  | -1353 | -2049 | -2745 |
|                           | 10                           | 3772                     | 2950 | 2124 | 1291  | 421   | -449  | -1318 | -2188 | -3058 | -3928 | -4798 |
|                           | 12                           | 3479                     | 2490 | 1495 | 456   | -588  | -1631 | -2675 | -3719 | -4763 | -5807 | -6850 |
| EIA \$25 without Feedback | 6                            | 2751                     | 2261 | 1771 | 1280  | 790   | 300   | -177  | -699  | -1221 | -1743 | -2265 |
|                           | 8                            | 2751                     | 2097 | 1444 | 790   | 136   | -525  | -1221 | -1917 | -2613 | -3309 | -4004 |
|                           | 10                           | 2751                     | 1934 | 1117 | 300   | -525  | -1395 | -2265 | -3135 | -4004 | -4874 | -5744 |
|                           | 12                           | 2751                     | 1771 | 790  | -177  | -1221 | -2265 | -3309 | -4352 | -5396 | -6440 | -7484 |
| EIA \$25 with Feedback    | 6                            | 2767                     | 2275 | 1782 | 1288  | 793   | 297   | -165  | -575  | -1055 | -1577 | -2099 |
|                           | 8                            | 2767                     | 2111 | 1453 | 793   | 130   | -437  | -1055 | -1751 | -2446 | -3142 | -3838 |
|                           | 10                           | 2767                     | 1946 | 1123 | 297   | -437  | -1229 | -2099 | -2968 | -3838 | -4708 | -5578 |
|                           | 12                           | 2767                     | 1782 | 793  | -165  | -1055 | -2099 | -3142 | -4186 | -5230 | -6274 | -7317 |

Table S8. Full list of cost targets for fuel switch to biomethane and addition of carbon capture and storage in 2030 with increase to high capacity factor (87%).

| 2030                      |                              | Fuel Cost (\$ per mmbTU) |      |      |       |       |       |       |       |       |       |       |
|---------------------------|------------------------------|--------------------------|------|------|-------|-------|-------|-------|-------|-------|-------|-------|
| Emissions Pricing         | Heat Rate<br>(mmbTU per MWh) | 0                        | 1    | 2    | 3     | 4     | 5     | 6     | 7     | 8     | 9     | 10    |
|                           |                              | Capital Cost (\$ per kW) |      |      |       |       |       |       |       |       |       |       |
| No Emissions Pricing      | 6                            | 1371                     | 909  | 445  | -15   | -393  | -771  | -1152 | -1594 | -2079 | -2565 | -3050 |
|                           | 8                            | 1371                     | 754  | 136  | -393  | -897  | -1432 | -2079 | -2726 | -3374 | -4021 | -4668 |
|                           | 10                           | 1371                     | 600  | -141 | -771  | -1432 | -2241 | -3050 | -3859 | -4668 | -5477 | -6285 |
|                           | 12                           | 1371                     | 445  | -393 | -1152 | -2079 | -3050 | -4021 | -4991 | -5962 | -6932 | -7903 |
| 3% Social Cost            | 6                            | 4013                     | 3551 | 3088 | 2625  | 2160  | 1694  | 1209  | 724   | 239   | -247  | -732  |
|                           | 8                            | 3719                     | 3102 | 2484 | 1863  | 1222  | 575   | -72   | -719  | -1366 | -2013 | -2660 |
|                           | 10                           | 3425                     | 2653 | 1878 | 1074  | 265   | -544  | -1353 | -2162 | -2971 | -3779 | -4588 |
|                           | 12                           | 3131                     | 2203 | 1248 | 278   | -693  | -1663 | -2634 | -3605 | -4575 | -5546 | -6517 |
| EIA \$25 without Feedback | 6                            | 2807                     | 2348 | 1889 | 1430  | 971   | 511   | 47    | -438  | -924  | -1409 | -1894 |
|                           | 8                            | 2807                     | 2195 | 1583 | 971   | 358   | -277  | -924  | -1571 | -2218 | -2865 | -3512 |
|                           | 10                           | 2807                     | 2042 | 1277 | 511   | -277  | -1085 | -1894 | -2703 | -3512 | -4321 | -5130 |
|                           | 12                           | 2807                     | 1889 | 971  | 47    | -924  | -1894 | -2865 | -3836 | -4806 | -5777 | -6747 |
| EIA \$25 with Feedback    | 6                            | 2798                     | 2338 | 1879 | 1420  | 960   | 500   | 38    | -352  | -782  | -1267 | -1753 |
|                           | 8                            | 2798                     | 2185 | 1573 | 960   | 346   | -223  | -782  | -1429 | -2076 | -2723 | -3370 |
|                           | 10                           | 2798                     | 2032 | 1266 | 500   | -223  | -944  | -1753 | -2561 | -3370 | -4179 | -4988 |
|                           | 12                           | 2798                     | 1879 | 960  | 38    | -782  | -1753 | -2723 | -3694 | -4664 | -5635 | -6606 |

Table S9. Full list of cost targets for fuel switch to biomethane and addition of carbon capture and storage in 2035 with increase to high capacity factor (87%).

| 2035                      |                              | Fuel Cost (\$ per mmbTU) |      |      |      |       |       |       |       |       |       |       |
|---------------------------|------------------------------|--------------------------|------|------|------|-------|-------|-------|-------|-------|-------|-------|
| Emissions Pricing         | Heat Rate<br>(mmbTU per MWh) | 0                        | 1    | 2    | 3    | 4     | 5     | 6     | 7     | 8     | 9     | 10    |
|                           |                              | Capital Cost (\$ per kW) |      |      |      |       |       |       |       |       |       |       |
| No Emissions Pricing      | 6                            | 1241                     | 831  | 421  | 11   | -325  | -659  | -993  | -1351 | -1778 | -2207 | -2636 |
|                           | 8                            | 1241                     | 694  | 148  | -325 | -770  | -1227 | -1778 | -2350 | -2922 | -3494 | -4067 |
|                           | 10                           | 1241                     | 558  | -102 | -659 | -1227 | -1921 | -2636 | -3351 | -4067 | -4782 | -5497 |
|                           | 12                           | 1241                     | 421  | -325 | -993 | -1778 | -2636 | -3494 | -4353 | -5211 | -6069 | -6927 |
| 3% Social Cost            | 6                            | 3589                     | 3167 | 2738 | 2309 | 1880  | 1451  | 1022  | 593   | 164   | -265  | -694  |
|                           | 8                            | 3305                     | 2733 | 2161 | 1589 | 1017  | 445   | -127  | -699  | -1271 | -1843 | -2415 |
|                           | 10                           | 3014                     | 2299 | 1584 | 869  | 154   | -561  | -1276 | -1991 | -2706 | -3421 | -4136 |
|                           | 12                           | 2723                     | 1865 | 1007 | 149  | -709  | -1567 | -2425 | -3283 | -4141 | -5000 | -5858 |
| EIA \$25 without Feedback | 6                            | 2609                     | 2201 | 1792 | 1384 | 975   | 564   | 141   | -288  | -717  | -1146 | -1575 |
|                           | 8                            | 2609                     | 2065 | 1520 | 975  | 426   | -145  | -717  | -1289 | -1861 | -2433 | -3005 |
|                           | 10                           | 2609                     | 1928 | 1248 | 564  | -145  | -860  | -1575 | -2290 | -3005 | -3720 | -4436 |
|                           | 12                           | 2609                     | 1792 | 975  | 141  | -717  | -1575 | -2433 | -3291 | -4150 | -5008 | -5866 |
| EIA \$25 with Feedback    | 6                            | 2734                     | 2326 | 1918 | 1510 | 1101  | 693   | 283   | -104  | -456  | -885  | -1314 |
|                           | 8                            | 2734                     | 2190 | 1646 | 1101 | 556   | 10    | -456  | -1028 | -1600 | -2172 | -2744 |
|                           | 10                           | 2734                     | 2054 | 1374 | 693  | 10    | -599  | -1314 | -2029 | -2744 | -3459 | -4175 |
|                           | 12                           | 2734                     | 1918 | 1101 | 283  | -456  | -1314 | -2172 | -3030 | -3888 | -4747 | -5605 |

Table S10. Full list of cost targets for fuel switch to biomethane and addition of carbon capture and storage in 2040 with increase to high capacity factor (87%).

| 2040                      |                              | Fuel Cost (\$ per mmBTU) |      |      |      |       |       |       |       |       |       |       |
|---------------------------|------------------------------|--------------------------|------|------|------|-------|-------|-------|-------|-------|-------|-------|
|                           |                              | 0                        | 1    | 2    | 3    | 4     | 5     | 6     | 7     | 8     | 9     | 10    |
| Emissions Pricing         | Heat Rate<br>(mmBTU per MWh) | Capital Cost (\$ per kW) |      |      |      |       |       |       |       |       |       |       |
| No Emissions Pricing      | 6                            | 971                      | 655  | 339  | 22   | -248  | -515  | -781  | -1074 | -1417 | -1759 | -2102 |
|                           | 8                            | 971                      | 549  | 128  | -248 | -603  | -962  | -1417 | -1874 | -2330 | -2787 | -3243 |
|                           | 10                           | 971                      | 444  | -70  | -515 | -962  | -1531 | -2102 | -2673 | -3243 | -3814 | -4385 |
|                           | 12                           | 971                      | 339  | -248 | -781 | -1417 | -2102 | -2787 | -3472 | -4156 | -4841 | -5526 |
| 3% Social Cost            | 6                            | 2845                     | 2503 | 2160 | 1818 | 1475  | 1133  | 791   | 448   | 106   | -237  | -579  |
|                           | 8                            | 2602                     | 2145 | 1688 | 1232 | 775   | 319   | -138  | -595  | -1051 | -1508 | -1964 |
|                           | 10                           | 2358                     | 1787 | 1216 | 646  | 75    | -496  | -1067 | -1637 | -2208 | -2779 | -3350 |
|                           | 12                           | 2114                     | 1429 | 744  | 59   | -626  | -1310 | -1995 | -2680 | -3365 | -4050 | -4735 |
| EIA \$25 without Feedback | 6                            | 1955                     | 1639 | 1323 | 1007 | 690   | 373   | 53    | -290  | -632  | -975  | -1317 |
|                           | 8                            | 1955                     | 1534 | 1112 | 690  | 267   | -176  | -632  | -1089 | -1545 | -2002 | -2459 |
|                           | 10                           | 1955                     | 1429 | 901  | 373  | -176  | -746  | -1317 | -1888 | -2459 | -3029 | -3600 |
|                           | 12                           | 1955                     | 1323 | 690  | 53   | -632  | -1317 | -2002 | -2687 | -3372 | -4057 | -4742 |
| EIA \$25 with Feedback    | 6                            | 2337                     | 2021 | 1705 | 1389 | 1073  | 757   | 441   | 125   | -184  | -527  | -869  |
|                           | 8                            | 2337                     | 1916 | 1494 | 1073 | 652   | 230   | -184  | -641  | -1098 | -1554 | -2011 |
|                           | 10                           | 2337                     | 1810 | 1284 | 757  | 230   | -298  | -869  | -1440 | -2011 | -2581 | -3152 |
|                           | 12                           | 2337                     | 1705 | 1073 | 441  | -184  | -869  | -1554 | -2239 | -2924 | -3609 | -4294 |

Table S11. Full list of cost targets for fuel switch to biomethane and addition of carbon capture in 2025 with varying biomethane emissions at constant average capacity factor (58%).

| 2025 - Constant Avg Capacity Factor       |                              | Fuel Cost (\$ per mmBTU) |      |      |       |       |       |       |       |       |       |       |
|-------------------------------------------|------------------------------|--------------------------|------|------|-------|-------|-------|-------|-------|-------|-------|-------|
|                                           |                              | 0                        | 1    | 2    | 3     | 4     | 5     | 6     | 7     | 8     | 9     | 10    |
| Biomethane Emissions Scenario             | Heat Rate<br>(mmBTU per MWh) | Capital Cost (\$ per kW) |      |      |       |       |       |       |       |       |       |       |
| High<br>(50 g CO <sub>2</sub> per MJ)     | 6                            | 2481                     | 2117 | 1751 | 1380  | 1000  | 620   | 239   | -141  | -521  | -901  | -1282 |
|                                           | 8                            | 2052                     | 1562 | 1056 | 549   | 42    | -465  | -972  | -1479 | -1986 | -2493 | -3000 |
|                                           | 10                           | 1618                     | 984  | 351  | -283  | -917  | -1551 | -2184 | -2818 | -3452 | -4085 | -4719 |
|                                           | 12                           | 1167                     | 406  | -354 | -1115 | -1875 | -2636 | -3396 | -4157 | -4917 | -5678 | -6438 |
| Baseline<br>(25 g CO <sub>2</sub> per MJ) | 6                            | 3123                     | 2760 | 2396 | 2032  | 1666  | 1297  | 916   | 536   | 156   | -224  | -605  |
|                                           | 8                            | 2909                     | 2425 | 1938 | 1449  | 944   | 437   | -70   | -577  | -1084 | -1591 | -2098 |
|                                           | 10                           | 2695                     | 2089 | 1478 | 845   | 212   | -422  | -1056 | -1690 | -2323 | -2957 | -3591 |
|                                           | 12                           | 2481                     | 1751 | 1000 | 239   | -521  | -1282 | -2042 | -2802 | -3563 | -4323 | -5084 |
| Low<br>(12.5 g CO <sub>2</sub> per MJ)    | 6                            | 3443                     | 3080 | 2717 | 2354  | 1989  | 1624  | 1255  | 875   | 494   | 114   | -266  |
|                                           | 8                            | 3336                     | 2852 | 2368 | 1882  | 1393  | 889   | 382   | -125  | -632  | -1139 | -1646 |
|                                           | 10                           | 3229                     | 2625 | 2018 | 1407  | 776   | 142   | -492  | -1125 | -1759 | -2393 | -3027 |
|                                           | 12                           | 3123                     | 2396 | 1666 | 916   | 156   | -605  | -1365 | -2125 | -2886 | -3646 | -4407 |

Table S12. Full list of cost targets for fuel switch to biomethane and addition of carbon capture in 2025 with varying biomethane emissions and increase to high capacity factor (87%).

| 2025 - High Capacity Factor               |                           | Fuel Cost (\$ per mmbTU) |      |      |       |       |       |       |       |       |       |       |
|-------------------------------------------|---------------------------|--------------------------|------|------|-------|-------|-------|-------|-------|-------|-------|-------|
| Biomethane Emissions Scenario             | Heat Rate (mmbTU per MWh) | 0                        | 1    | 2    | 3     | 4     | 5     | 6     | 7     | 8     | 9     | 10    |
|                                           |                           | Capital Cost (\$ per kW) |      |      |       |       |       |       |       |       |       |       |
| High<br>(50 g CO <sub>2</sub> per MJ)     | 6                         | 3479                     | 2985 | 2490 | 1994  | 1495  | 978   | 456   | -66   | -588  | -1110 | -1631 |
|                                           | 8                         | 2891                     | 2231 | 1565 | 874   | 178   | -518  | -1214 | -1910 | -2606 | -3302 | -3997 |
|                                           | 10                        | 2302                     | 1465 | 595  | -275  | -1144 | -2014 | -2884 | -3754 | -4624 | -5493 | -6363 |
|                                           | 12                        | 1707                     | 665  | -379 | -1423 | -2466 | -3510 | -4554 | -5598 | -6642 | -7685 | -8729 |
| Baseline<br>(25 g CO <sub>2</sub> per MJ) | 6                         | 4358                     | 3865 | 3372 | 2879  | 2384  | 1888  | 1388  | 874   | 352   | -170  | -692  |
|                                           | 8                         | 4065                     | 3408 | 2750 | 2089  | 1424  | 734   | 39    | -657  | -1353 | -2049 | -2745 |
|                                           | 10                        | 3772                     | 2950 | 2124 | 1291  | 421   | -449  | -1318 | -2188 | -3058 | -3928 | -4798 |
|                                           | 12                        | 3479                     | 2490 | 1495 | 456   | -588  | -1631 | -2675 | -3719 | -4763 | -5807 | -6850 |
| Low<br>(12.5 g CO <sub>2</sub> per MJ)    | 6                         | 4797                     | 4305 | 3812 | 3319  | 2826  | 2331  | 1834  | 1335  | 821   | 300   | -222  |
|                                           | 8                         | 4651                     | 3994 | 3337 | 2679  | 2018  | 1353  | 665   | -31   | -727  | -1423 | -2119 |
|                                           | 10                        | 4505                     | 3683 | 2861 | 2036  | 1203  | 334   | -535  | -1405 | -2275 | -3145 | -4015 |
|                                           | 12                        | 4358                     | 3372 | 2384 | 1388  | 352   | -692  | -1736 | -2780 | -3823 | -4867 | -5911 |

## References

- (1) U.S. Energy Information Administration, Annual Energy Outlook 2020. 2020.
- (2) Skone, T.; James, R. *Life Cycle Analysis: Natural Gas Combined Cycle (NGCC) Power Plant*; DOE/NETL-403-110509; National Energy Technology Laboratory, 2010; p 151.
- (3) Alvarez, R. A.; Zavala-Araiza, D.; Lyon, D. R.; Allen, D. T.; Barkley, Z. R.; Brandt, A. R.; Davis, K. J.; Herndon, S. C.; Jacob, D. J.; Karion, A.; Kort, E. A.; Lamb, B. K.; Lauvaux, T.; Maasakkers, J. D.; Marchese, A. J.; Omara, M.; Pacala, S. W.; Peischl, J.; Robinson, A. L.; Shepson, P. B.; Sweeney, C.; Townsend-Small, A.; Wofsy, S. C.; Hamburg, S. P. Assessment of Methane Emissions from the U.S. Oil and Gas Supply Chain. *Science* **2018**. <https://doi.org/10.1126/science.aar7204>.
- (4) Jaffe, A. M. *UC Davis. The Feasibility of Renewable Natural Gas as a Large-Scale, Low Carbon Substitute*; 2016.
- (5) Murray, B. C.; Galik, C. S.; Vegh, T. *Duke Nicholas Institute. Biogas in the United States, An Assessment of Market Potential in a Carbon-Constrained Future*; 2014.
- (6) Lebron, F.; Bertet, J.-C. Los Angeles Department of Water & Power's Initial Response to the Committee's Scoping Order Dated July 27, 2016; Supporting Memorandum of Points and Authorities. September 1, 2016.
- (7) Assumptions to the Annual Energy Outlook 2020: Electricity Market Module. **2020**, 35.
- (8) National Renewable Energy Laboratory. 2019 Annual Technology Baseline <https://atb.nrel.gov/> (accessed May 14, 2020).
